# Supplementary material for: KIR gene content imputation from single-nucleotide polymorphisms in the Finnish population
Source: PeerJ journal article supplement (doi:10.7717/peerj.12692), 2022-01-07
Supplement: Supplemental_Figures.pdf [file Supplemental_Figures.pdf]

## Supplemental Figures

### KIR gene content imputation from single-nucleotide polymorphisms in the Finnish population

Jarmo Ritari<sup>1</sup>, Kati Hyvärinen<sup>1</sup>, Jukka Partanen<sup>1</sup>, Satu Koskela<sup>1</sup>

<sup>1</sup>Finnish Red Cross Blood Service, Helsinki, Finland

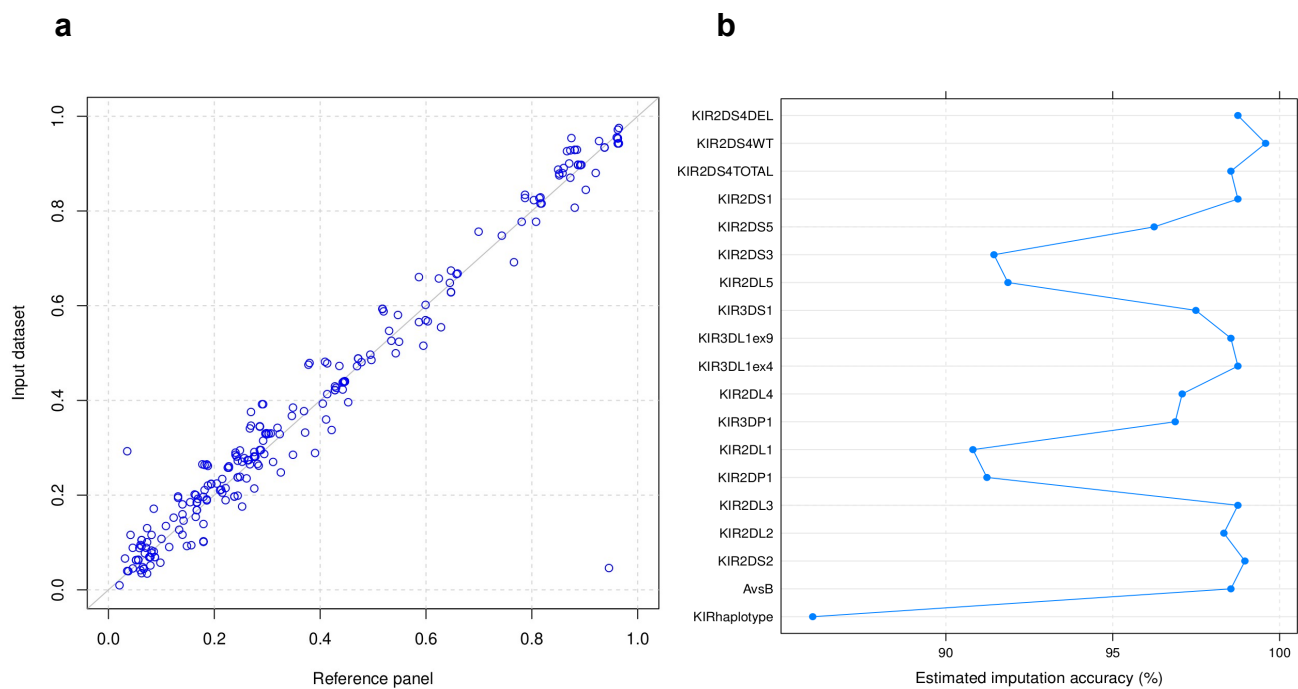

**Figure S1.** KIR\*IMP input data validity check. (A) Scatterplot showing the SNP allele frequencies in the KIR\*IMP reference panel (x-axis) and in the input data (y-axis). (B) KIR\*IMP imputation accuracy estimate based on SNPs present in the input data.
