# Supplementary material for: KIR gene content imputation from single-nucleotide polymorphisms in the Finnish population
Source: PeerJ journal article supplement (doi:10.7717/peerj.12692), 2022-01-07
Supplement: Table_S1.xls [file Table_S1.xls]

## Sheet: TableS1
Imputation_target_gene	Chr	Pos	CountedAllele	Importance
KIR_2DL1	19	54789277	G	0.00874162
KIR_2DL1	19	54789442	C	0.00870958
KIR_2DL1	19	54789553	T	0.0081359
KIR_2DL1	19	54789659	G	0.000770791
KIR_2DL1	19	54788617	T	0.000550218
KIR_2DL1	19	54734271	T	0.00046193
KIR_2DL1	19	54743789	CT	0.000452085
KIR_2DL1	19	54740220	G	0.00044805
KIR_2DL1	19	54742314	C	0.00043906
KIR_2DL1	19	54742464	G	0.000435447
KIR_2DL1	19	54737408	C	0.000429454
KIR_2DL1	19	54741124	G	0.000421384
KIR_2DL1	19	54737392	G	0.0004018
KIR_2DL1	19	54742075	G	0.00037933
KIR_2DL1	19	54738105	C	0.000369949
KIR_2DL1	19	54741269	A	0.000357651
KIR_2DL1	19	54744717	T	0.000356287
KIR_2DL1	19	54738696	A	0.000353073
KIR_2DL1	19	54741750	C	0.000352203
KIR_2DL1	19	54738065	C	0.000336503
KIR_2DL1	19	54741104	T	0.000311059
KIR_2DL1	19	54740939	T	0.000292376
KIR_2DL1	19	54734389	G	0.000288307
KIR_2DL1	19	54734250	C	0.00027274
KIR_2DL1	19	54740379	A	0.000270681
KIR_2DL1	19	54740611	T	0.000246762
KIR_2DL1	19	54744641	T	0.000238339
KIR_2DL1	19	54741342	T	0.000230806
KIR_2DL1	19	54736605	C	0.000217768
KIR_2DL1	19	54735264	C	0.00021419
KIR_2DL1	19	54740462	A	0.000123011
KIR_2DL1	19	54920225	A	0.000105942
KIR_2DL1	19	54783939	C	6.61996e-05
KIR_2DL1	19	54783475	A	5.46708e-05
KIR_2DL2	19	54738696	A	0.24869
KIR_2DL2	19	54742314	C	0.0360951
KIR_2DL2	19	54742464	G	0.0331291
KIR_2DL2	19	54741124	G	0.0298115
KIR_2DL2	19	54737392	G	0.0291538
KIR_2DL2	19	54740462	A	0.0280805
KIR_2DL2	19	54738065	C	0.0272197
KIR_2DL2	19	54741104	T	0.0266841
KIR_2DL2	19	54742075	G	0.0168927
KIR_2DL2	19	54734250	C	0.000335036
KIR_2DL2	19	54734271	T	0.000247557
KIR_2DL3	19	54738696	A	0.0138123
KIR_2DL3	19	54734271	T	0.0127085
KIR_2DL3	19	54741104	T	0.0123435
KIR_2DL3	19	54734250	C	0.0123034
KIR_2DL3	19	54737392	G	0.0118836
KIR_2DL3	19	54742464	G	0.0114758
KIR_2DL3	19	54738065	C	0.0111254
KIR_2DL3	19	54742314	C	0.0110036
KIR_2DL3	19	54741124	G	0.0109459
KIR_2DL3	19	54740462	A	0.00391569
KIR_2DL3	19	54783939	C	0.000207438
KIR_2DL5	19	54828101	G	0.1774
KIR_2DL5	19	54789489	A	0.0858876
KIR_2DL5	19	54824263	T	0.0685611
KIR_2DL5	19	54788186	T	0.0184251
KIR_2DL5	19	54786857	A	0.0164432
KIR_2DL5	19	54787977	T	0.0157896
KIR_2DL5	19	54787456	T	0.0153921
KIR_2DL5	19	54835981	C	0.0142516
KIR_2DL5	19	54835911	G	0.0113674
KIR_2DL5	19	54836036	A	0.00943859
KIR_2DL5	19	54853020	T	0.00865133
KIR_2DL5	19	54836220	G	0.00794924
KIR_2DL5	19	54836035	C	0.00738237
KIR_2DL5	19	54836206	T	0.00699544
KIR_2DL5	19	54817464	A	0.00369656
KIR_2DL5	19	54818581	A	0.00343536
KIR_2DL5	19	54836084	G	0.00305019
KIR_2DL5	19	54818758	A	0.00270012
KIR_2DL5	19	54819238	CAGGAACCCAGGTCAAGGACAAGTT	0.00241214
KIR_2DL5	19	54825145	C	0.00199326
KIR_2DL5	19	54824701	G	0.00149853
KIR_2DL5	19	54825430	G	0.00138734
KIR_2DL5	19	54824717	C	0.0013263
KIR_2DL5	19	54825421	C	0.00113527
KIR_2DL5	19	54825429	T	0.00110896
KIR_2DL5	19	54825356	G	0.000880494
KIR_2DL5	19	54824723	C	0.000864647
KIR_2DL5	19	54821224	AAATAGATAGATCGATAGAT	0.000824285
KIR_2DL5	19	54825339	A	0.000709789
KIR_2DL5	19	54823016	T	0.000686846
KIR_2DL5	19	54888925	A	0.000638514
KIR_2DL5	19	54889804	G	0.000604235
KIR_2DL5	19	54659888	T	0.000590351
KIR_2DL5	19	54657292	A	0.000580719
KIR_2DL5	19	54856033	A	0.000576677
KIR_2DL5	19	54864728	G	0.000561314
KIR_2DL5	19	54632756	G	0.00054568
KIR_2DL5	19	54648542	C	0.000508985
KIR_2DL5	19	54816238	A	0.000487435
KIR_2DL5	19	54827662	C	0.000474563
KIR_2DL5	19	54821254	C	0.000469548
KIR_2DL5	19	54819189	T	0.000458415
KIR_2DL5	19	54874420	T	0.000437538
KIR_2DL5	19	54864836	C	0.000415855
KIR_2DL5	19	54864779	G	0.000410388
KIR_2DL5	19	54758227	C	0.000410196
KIR_2DL5	19	54865114	G	0.000397541
KIR_2DL5	19	54880250	A	0.000368656
KIR_2DL5	19	54865069	T	0.000368182
KIR_2DL5	19	54866553	T	0.00036724
KIR_2DL5	19	54827742	A	0.000345319
KIR_2DL5	19	54946034	A	0.000336809
KIR_2DL5	19	54856723	T	0.000330517
KIR_2DL5	19	54880440	C	0.000329559
KIR_2DL5	19	54873950	A	0.000324504
KIR_2DL5	19	54862632	C	0.000317883
KIR_2DL5	19	54859702	T	0.000317092
KIR_2DL5	19	54875434	A	0.000313529
KIR_2DL5	19	54758732	A	0.000297328
KIR_2DL5	19	54860473	G	0.000297114
KIR_2DL5	19	54958363	T	0.00029317
KIR_2DL5	19	54818732	C	0.000275843
KIR_2DL5	19	54816328	C	0.000275829
KIR_2DL5	19	54872451	A	0.000266065
KIR_2DL5	19	54882390	G	0.000262921
KIR_2DL5	19	54858684	T	0.000261151
KIR_2DL5	19	54867871	T	0.000259431
KIR_2DL5	19	54809941	T	0.000259155
KIR_2DL5	19	54815158	A	0.000255528
KIR_2DL5	19	54803192	G	0.00025546
KIR_2DL5	19	54818060	A	0.000249707
KIR_2DL5	19	54815139	G	0.000242505
KIR_2DL5	19	54827491	G	0.000224979
KIR_2DL5	19	54828699	T	0.000224506
KIR_2DL5	19	54976414	G	0.000221839
KIR_2DL5	19	54815615	T	0.000218325
KIR_2DL5	19	54858404	T	0.000212684
KIR_2DL5	19	54878208	T	0.000201785
KIR_2DL5	19	54872846	A	0.000198624
KIR_2DL5	19	54859612	G	0.000196507
KIR_2DL5	19	54827723	T	0.000195663
KIR_2DL5	19	54768620	C	0.000193762
KIR_2DL5	19	54793716	A	0.000192678
KIR_2DL5	19	54772052	G	0.000180531
KIR_2DL5	19	54819009	A	0.000178468
KIR_2DL5	19	54859992	C	0.000177863
KIR_2DL5	19	54666720	T	0.00017506
KIR_2DL5	19	54796266	A	0.000174966
KIR_2DL5	19	54748127	A	0.000165446
KIR_2DL5	19	54476587	G	0.000155948
KIR_2DL5	19	54645838	CATATATAT	0.000150089
KIR_2DL5	19	54771859	A	0.000149812
KIR_2DL5	19	54762981	A	0.000149697
KIR_2DL5	19	54740352	G	0.000147779
KIR_2DL5	19	54743448	T	0.000146568
KIR_2DL5	19	54818928	G	0.000143038
KIR_2DL5	19	54851913	T	0.000141219
KIR_2DL5	19	54827610	G	0.000141156
KIR_2DL5	19	54481542	GTC	0.000140611
KIR_2DL5	19	54845634	A	0.000139582
KIR_2DL5	19	54849083	G	0.00013511
KIR_2DL5	19	54845969	T	0.000134062
KIR_2DL5	19	54818665	C	0.000132141
KIR_2DL5	19	54433378	T	0.000129738
KIR_2DL5	19	54850487	G	0.000126437
KIR_2DL5	19	54738683	A	0.000126088
KIR_2DL5	19	54852249	A	0.000125951
KIR_2DL5	19	54740410	C	0.000125132
KIR_2DL5	19	54771610	A	0.000124404
KIR_2DL5	19	54975747	T	0.000121742
KIR_2DL5	19	54942706	A	0.000121215
KIR_2DL5	19	54818926	G	0.000119048
KIR_2DL5	19	54758731	C	0.00011687
KIR_2DL5	19	54818367	C	0.000116013
KIR_2DL5	19	54742780	C	0.000115722
KIR_2DL5	19	54849624	C	0.000115079
KIR_2DL5	19	54868759	G	0.000112446
KIR_2DL5	19	54545096	C	0.00010949
KIR_2DL5	19	54803852	G	0.000106531
KIR_2DL5	19	54826776	C	0.000106246
KIR_2DL5	19	54851404	T	0.000104727
KIR_2DL5	19	54813019	T	0.000103577
KIR_2DL5	19	54825579	A	0.000101594
KIR_2DL5	19	54501951	G	0.000101478
KIR_2DL5	19	54819424	T	0.000100688
KIR_2DL5	19	54628556	A	0.000100124
KIR_2DL5	19	54813668	C	9.89933e-05
KIR_2DL5	19	54687400	G	9.79168e-05
KIR_2DL5	19	54758198	C	9.39752e-05
KIR_2DL5	19	54810646	G	9.32184e-05
KIR_2DL5	19	54978689	G	9.29174e-05
KIR_2DL5	19	54906629	A	9.10881e-05
KIR_2DL5	19	54772050	T	9.09881e-05
KIR_2DL5	19	54744221	A	9.08713e-05
KIR_2DL5	19	54745881	T	8.92899e-05
KIR_2DL5	19	54420459	A	8.92868e-05
KIR_2DL5	19	54617958	T	8.86327e-05
KIR_2DL5	19	54719097	A	8.68907e-05
KIR_2DL5	19	54815284	C	8.6778e-05
KIR_2DL5	19	54820735	A	8.55228e-05
KIR_2DL5	19	54599083	G	8.46846e-05
KIR_2DL5	19	54535766	G	8.46294e-05
KIR_2DL5	19	54816505	C	8.39509e-05
KIR_2DL5	19	54982758	G	8.35258e-05
KIR_2DL5	19	54772049	ACTG	8.30619e-05
KIR_2DL5	19	54826792	T	8.1542e-05
KIR_2DL5	19	54420598	G	7.98312e-05
KIR_2DL5	19	54851595	A	7.96528e-05
KIR_2DL5	19	54846001	C	7.91386e-05
KIR_2DL5	19	54818815	T	7.87336e-05
KIR_2DL5	19	54589798	A	7.84035e-05
KIR_2DL5	19	54612072	A	7.596e-05
KIR_2DL5	19	54622548	G	7.46923e-05
KIR_2DL5	19	54849692	G	7.3587e-05
KIR_2DL5	19	54642541	C	7.26934e-05
KIR_2DL5	19	54574672	T	7.10858e-05
KIR_2DL5	19	54637949	A	7.09005e-05
KIR_2DL5	19	54556463	C	7.02852e-05
KIR_2DL5	19	54804874	G	6.87782e-05
KIR_2DL5	19	54760546	C	6.68871e-05
KIR_2DL5	19	54815265	T	6.40724e-05
KIR_2DL5	19	54807705	C	6.28751e-05
KIR_2DL5	19	54772176	G	6.27119e-05
KIR_2DL5	19	54867035	G	5.97764e-05
KIR_2DL5	19	54806069	A	5.6572e-05
KIR_2DL5	19	54432038	C	5.63112e-05
KIR_2DL5	19	54851264	G	5.47791e-05
KIR_2DL5	19	54801543	T	5.38996e-05
KIR_2DL5	19	54815642	G	5.29097e-05
KIR_2DL5	19	54810735	C	5.21389e-05
KIR_2DL5	19	54875464	A	5.12323e-05
KIR_2DL5	19	54820520	A	5.06993e-05
KIR_2DL5	19	54846295	T	5.05051e-05
KIR_2DL5	19	54609147	A	5.04167e-05
KIR_2DP1	19	54789442	C	0.0089858
KIR_2DP1	19	54789553	T	0.00855339
KIR_2DP1	19	54789277	G	0.00853117
KIR_2DP1	19	54789659	G	0.000759045
KIR_2DP1	19	54788617	T	0.000644737
KIR_2DP1	19	54743789	CT	0.000432946
KIR_2DP1	19	54737392	G	0.000431521
KIR_2DP1	19	54738065	C	0.000422894
KIR_2DP1	19	54734250	C	0.000398899
KIR_2DP1	19	54741104	T	0.000378598
KIR_2DP1	19	54740220	G	0.000378161
KIR_2DP1	19	54734271	T	0.000369568
KIR_2DP1	19	54738696	A	0.000367489
KIR_2DP1	19	54734389	G	0.000366705
KIR_2DP1	19	54741269	A	0.000358582
KIR_2DP1	19	54741124	G	0.000342775
KIR_2DP1	19	54740611	T	0.000326548
KIR_2DP1	19	54741342	T	0.000323191
KIR_2DP1	19	54742075	G	0.000320502
KIR_2DP1	19	54740939	T	0.000299998
KIR_2DP1	19	54742314	C	0.00028707
KIR_2DP1	19	54744641	T	0.000283003
KIR_2DP1	19	54738105	C	0.000282349
KIR_2DP1	19	54741750	C	0.000279102
KIR_2DP1	19	54742464	G	0.000276507
KIR_2DP1	19	54737408	C	0.000272939
KIR_2DP1	19	54735264	C	0.000267411
KIR_2DP1	19	54740379	A	0.000229881
KIR_2DP1	19	54744717	T	0.000213479
KIR_2DP1	19	54740462	A	0.000155503
KIR_2DP1	19	54736605	C	0.000141666
KIR_2DP1	19	54783939	C	8.38936e-05
KIR_2DP1	19	54554402	T	5.26853e-05
KIR_2DS1	19	54849746	G	0.40653
KIR_2DS1	19	54852249	A	0.0320249
KIR_2DS1	19	54835911	G	0.0102751
KIR_2DS1	19	54836220	G	0.00500571
KIR_2DS1	19	54836206	T	0.00476767
KIR_2DS1	19	54835981	C	0.00391794
KIR_2DS1	19	54846295	T	0.00220575
KIR_2DS1	19	54889804	G	0.0018296
KIR_2DS1	19	54888925	A	0.00174894
KIR_2DS1	19	54851595	A	0.00130733
KIR_2DS1	19	54853020	T	0.000940103
KIR_2DS1	19	54873341	A	0.000542045
KIR_2DS1	19	54836084	G	0.000495949
KIR_2DS1	19	54875434	A	0.000492405
KIR_2DS1	19	54878208	T	0.000480626
KIR_2DS1	19	54873979	C	0.000439719
KIR_2DS1	19	54915227	G	0.000428683
KIR_2DS1	19	54872846	A	0.000424512
KIR_2DS1	19	54871595	A	0.000420739
KIR_2DS1	19	54958363	T	0.000404068
KIR_2DS1	19	54828101	G	0.000336783
KIR_2DS1	19	54880250	A	0.000328795
KIR_2DS1	19	54868759	G	0.000319168
KIR_2DS1	19	54882390	G	0.000311814
KIR_2DS1	19	54872711	T	0.000267399
KIR_2DS1	19	54875464	A	0.000219514
KIR_2DS1	19	54884334	T	0.000181658
KIR_2DS1	19	54732710	T	0.00017958
KIR_2DS1	19	54758122	G	0.000176935
KIR_2DS1	19	54825339	A	0.000176875
KIR_2DS1	19	54481542	GTC	0.000176424
KIR_2DS1	19	54706370	C	0.000161613
KIR_2DS1	19	54742971	G	0.000144885
KIR_2DS1	19	54433378	T	0.000144751
KIR_2DS1	19	54849624	C	0.000140375
KIR_2DS1	19	54978689	G	0.00013078
KIR_2DS1	19	54867871	T	0.000130406
KIR_2DS1	19	54849083	G	0.000120425
KIR_2DS1	19	54874148	T	0.000118586
KIR_2DS1	19	54846001	C	0.00011855
KIR_2DS1	19	54884461	A	0.000113308
KIR_2DS1	19	54836035	C	0.000110861
KIR_2DS1	19	54982758	G	0.000107241
KIR_2DS1	19	54880440	C	9.2831e-05
KIR_2DS1	19	54850487	G	8.40384e-05
KIR_2DS1	19	54845969	T	7.68973e-05
KIR_2DS1	19	54819238	CAGGAACCCAGGTCAAGGACAAGTT	7.51757e-05
KIR_2DS1	19	54825430	G	7.45834e-05
KIR_2DS1	19	54695896	C	7.07592e-05
KIR_2DS1	19	54825421	C	6.94915e-05
KIR_2DS1	19	54851264	G	6.92252e-05
KIR_2DS1	19	54845895	C	6.2877e-05
KIR_2DS1	19	54476587	G	6.19846e-05
KIR_2DS1	19	54697494	T	5.7267e-05
KIR_2DS1	19	54691080	A	5.11697e-05
KIR_2DS2	19	54742314	C	0.0684183
KIR_2DS2	19	54741124	G	0.0681228
KIR_2DS2	19	54737392	G	0.0656473
KIR_2DS2	19	54742464	G	0.0654802
KIR_2DS2	19	54741104	T	0.0649074
KIR_2DS2	19	54740462	A	0.0637138
KIR_2DS2	19	54738065	C	0.0593221
KIR_2DS2	19	54738696	A	0.0248058
KIR_2DS2	19	54734250	C	0.00197177
KIR_2DS2	19	54734271	T	0.000255814
KIR_2DS3	19	54760546	C	0.117252
KIR_2DS3	19	54772175	A	0.05392
KIR_2DS3	19	54845634	A	0.0520347
KIR_2DS3	19	54772176	G	0.0480577
KIR_2DS3	19	54789489	A	0.0205922
KIR_2DS3	19	54758732	A	0.0135699
KIR_2DS3	19	54826792	T	0.00639989
KIR_2DS3	19	54758731	C	0.0038919
KIR_2DS3	19	54826776	C	0.0037049
KIR_2DS3	19	54786857	A	0.00318652
KIR_2DS3	19	54788186	T	0.00247197
KIR_2DS3	19	54787977	T	0.00244657
KIR_2DS3	19	54758227	C	0.00237893
KIR_2DS3	19	54787456	T	0.00230654
KIR_2DS3	19	54562867	A	0.00191598
KIR_2DS3	19	54777396	T	0.00173748
KIR_2DS3	19	54814692	G	0.00159378
KIR_2DS3	19	54814715	C	0.00138733
KIR_2DS3	19	54814695	A	0.00136354
KIR_2DS3	19	54796266	A	0.000812388
KIR_2DS3	19	54793716	A	0.00079781
KIR_2DS3	19	54862632	C	0.000758967
KIR_2DS3	19	54856033	A	0.00075487
KIR_2DS3	19	54872451	A	0.000727623
KIR_2DS3	19	54759158	C	0.000663838
KIR_2DS3	19	54739530	G	0.000650691
KIR_2DS3	19	54766787	C	0.000635051
KIR_2DS3	19	54775892	CCTTTAACA	0.000609281
KIR_2DS3	19	54744717	T	0.0005421
KIR_2DS3	19	54786239	A	0.000533752
KIR_2DS3	19	54772815	G	0.000511558
KIR_2DS3	19	54873950	A	0.000508116
KIR_2DS3	19	54884461	A	0.000492972
KIR_2DS3	19	54758198	C	0.000462758
KIR_2DS3	19	54661894	T	0.000337823
KIR_2DS3	19	54887321	C	0.000318866
KIR_2DS3	19	54609147	A	0.000246791
KIR_2DS3	19	54782464	A	0.0002351
KIR_2DS3	19	54420459	A	0.000224196
KIR_2DS3	19	54789553	T	0.000205866
KIR_2DS3	19	54735264	C	0.000188672
KIR_2DS3	19	54996722	A	0.000170192
KIR_2DS3	19	54789277	G	0.000153276
KIR_2DS3	19	54788617	T	0.000152358
KIR_2DS3	19	54789442	C	0.000142983
KIR_2DS3	19	54887289	G	0.000127946
KIR_2DS3	19	54528959	AT	0.000122523
KIR_2DS3	19	54801018	T	0.000122276
KIR_2DS3	19	54789659	G	0.000114723
KIR_2DS3	19	54621599	A	0.00011436
KIR_2DS3	19	54455325	A	0.000103939
KIR_2DS3	19	54742075	G	9.91791e-05
KIR_2DS3	19	54986948	T	9.65285e-05
KIR_2DS3	19	54887947	T	9.19447e-05
KIR_2DS3	19	54546556	T	7.70002e-05
KIR_2DS3	19	54897160	A	7.41485e-05
KIR_2DS3	19	54922484	G	7.10453e-05
KIR_2DS3	19	54951885	A	6.77625e-05
KIR_2DS3	19	54885501	A	6.62618e-05
KIR_2DS3	19	54876497	A	6.58309e-05
KIR_2DS3	19	54616709	T	6.46339e-05
KIR_2DS3	19	54901875	A	6.457e-05
KIR_2DS3	19	54848999	A	6.17999e-05
KIR_2DS3	19	54817504	G	6.00541e-05
KIR_2DS3	19	54591634	A	5.84868e-05
KIR_2DS3	19	54614709	A	5.60872e-05
KIR_2DS3	19	54870060	A	5.56523e-05
KIR_2DS3	19	54879377	A	5.55527e-05
KIR_2DS3	19	54836049	C	5.5356e-05
KIR_2DS3	19	54791863	A	5.52032e-05
KIR_2DS3	19	54821684	C	5.37145e-05
KIR_2DS3	19	54874696	G	5.33164e-05
KIR_2DS3	19	54594497	T	5.12089e-05
KIR_2DS4	19	54849746	G	0.107245
KIR_2DS4	19	54852249	A	0.0202633
KIR_2DS4	19	54835911	G	0.000737385
KIR_2DS4	19	54836220	G	0.00048086
KIR_2DS4	19	54819238	CAGGAACCCAGGTCAAGGACAAGTT	0.000419507
KIR_2DS4	19	54836206	T	0.000341004
KIR_2DS4	19	54835981	C	0.000257066
KIR_2DS4	19	54828101	G	0.000234533
KIR_2DS4	19	54836084	G	0.000234525
KIR_2DS4	19	54819009	A	0.000193329
KIR_2DS4	19	54824263	T	0.000188552
KIR_2DS4	19	54851913	T	0.00011244
KIR_2DS4	19	54825339	A	0.000110784
KIR_2DS4	19	54851595	A	8.8348e-05
KIR_2DS4	19	54813377	A	7.47059e-05
KIR_2DS4	19	54860806	T	7.42092e-05
KIR_2DS4	19	54821224	AAATAGATAGATCGATAGAT	7.23167e-05
KIR_2DS4	19	54828224	C	6.91128e-05
KIR_2DS4	19	54875032	A	6.27843e-05
KIR_2DS4	19	54827662	C	6.12583e-05
KIR_2DS4	19	54827723	T	5.56522e-05
KIR_2DS4	19	54821003	AGATGATGAT	5.54171e-05
KIR_2DS4	19	54825356	G	5.22504e-05
KIR_2DS4	19	54828221	G	5.10948e-05
KIR_2DS5	19	54836084	G	0.242727
KIR_2DS5	19	54836220	G	0.0543142
KIR_2DS5	19	54828699	T	0.0138481
KIR_2DS5	19	54835981	C	0.0116822
KIR_2DS5	19	54835911	G	0.0103218
KIR_2DS5	19	54836206	T	0.00955885
KIR_2DS5	19	54853020	T	0.00702842
KIR_2DS5	19	54836035	C	0.00492909
KIR_2DS5	19	54826792	T	0.00463846
KIR_2DS5	19	54836114	G	0.0037291
KIR_2DS5	19	54852249	A	0.00324808
KIR_2DS5	19	54882744	A	0.00314322
KIR_2DS5	19	54818581	A	0.00301194
KIR_2DS5	19	54823016	T	0.002826
KIR_2DS5	19	54818758	A	0.00233442
KIR_2DS5	19	54836036	A	0.00231842
KIR_2DS5	19	54849746	G	0.00209947
KIR_2DS5	19	54835412	T	0.00140171
KIR_2DS5	19	54845634	A	0.00139997
KIR_2DS5	19	54826776	C	0.00138792
KIR_2DS5	19	54864728	G	0.00104355
KIR_2DS5	19	54821254	C	0.00101952
KIR_2DS5	19	54858404	T	0.00098795
KIR_2DS5	19	54858722	C	0.000896838
KIR_2DS5	19	54859992	C	0.000864897
KIR_2DS5	19	54846295	T	0.00064478
KIR_2DS5	19	54880440	C	0.000581307
KIR_2DS5	19	54813377	A	0.000573277
KIR_2DS5	19	54888925	A	0.000533447
KIR_2DS5	19	54889804	G	0.000522036
KIR_2DS5	19	54851595	A	0.000520082
KIR_2DS5	19	54827742	A	0.000475885
KIR_2DS5	19	54828699	A	0.000429642
KIR_2DS5	19	54659888	T	0.000396517
KIR_2DS5	19	54657292	A	0.000376889
KIR_2DS5	19	54743871	A	0.00035578
KIR_2DS5	19	54543419	A	0.000346806
KIR_2DS5	19	54820370	T	0.000339621
KIR_2DS5	19	54820202	G	0.000337407
KIR_2DS5	19	54898550	C	0.000331554
KIR_2DS5	19	54824723	C	0.00033035
KIR_2DS5	19	54815158	A	0.000327593
KIR_2DS5	19	54818479	G	0.000314321
KIR_2DS5	19	54827940	C	0.00030904
KIR_2DS5	19	54617958	T	0.000303159
KIR_2DS5	19	54648542	C	0.000302538
KIR_2DS5	19	54818665	C	0.000302481
KIR_2DS5	19	54828438	A	0.000300001
KIR_2DS5	19	54803852	G	0.000299886
KIR_2DS5	19	54858454	C	0.000288017
KIR_2DS5	19	54632756	G	0.000276519
KIR_2DS5	19	54851913	T	0.000268677
KIR_2DS5	19	54819428	A	0.000266497
KIR_2DS5	19	54898518	T	0.000265094
KIR_2DS5	19	54803871	C	0.0002642
KIR_2DS5	19	54822363	A	0.000263084
KIR_2DS5	19	54828596	A	0.000262824
KIR_2DS5	19	54819917	G	0.0002627
KIR_2DS5	19	54666720	T	0.00026065
KIR_2DS5	19	54819238	CAGGAACCCAGGTCAAGGACAAGTT	0.000252205
KIR_2DS5	19	54827926	C	0.000251915
KIR_2DS5	19	54827662	C	0.000249036
KIR_2DS5	19	54811602	G	0.000244354
KIR_2DS5	19	54819832	T	0.000244116
KIR_2DS5	19	54818164	A	0.00024369
KIR_2DS5	19	54810401	C	0.000234652
KIR_2DS5	19	54771859	A	0.000227983
KIR_2DS5	19	54768620	C	0.000216921
KIR_2DS5	19	54859629	G	0.000203792
KIR_2DS5	19	54861733	T	0.000196045
KIR_2DS5	19	54760508	A	0.000194137
KIR_2DS5	19	54816093	T	0.000193997
KIR_2DS5	19	54819067	G	0.000191319
KIR_2DS5	19	54939890	C	0.00019117
KIR_2DS5	19	54828221	G	0.000190687
KIR_2DS5	19	54825430	G	0.000187153
KIR_2DS5	19	54821003	AGATGATGAT	0.000177954
KIR_2DS5	19	54818926	G	0.000176319
KIR_2DS5	19	54825145	C	0.000175359
KIR_2DS5	19	54739493	G	0.000174991
KIR_2DS5	19	54874420	T	0.000174598
KIR_2DS5	19	54817464	A	0.000171197
KIR_2DS5	19	54861219	TG	0.000171144
KIR_2DS5	19	54822560	C	0.000170002
KIR_2DS5	19	54816328	C	0.000169839
KIR_2DS5	19	54512184	A	0.000169268
KIR_2DS5	19	54819907	T	0.000168578
KIR_2DS5	19	54828215	A	0.000168457
KIR_2DS5	19	54817727	A	0.000166648
KIR_2DS5	19	54939888	T	0.000165272
KIR_2DS5	19	54824717	C	0.000164349
KIR_2DS5	19	54815104	G	0.00016423
KIR_2DS5	19	54816238	A	0.000162404
KIR_2DS5	19	54818928	G	0.000161184
KIR_2DS5	19	54805678	T	0.000159645
KIR_2DS5	19	54827723	T	0.000158849
KIR_2DS5	19	54813668	C	0.000155583
KIR_2DS5	19	54884334	T	0.000155218
KIR_2DS5	19	54825421	C	0.000153203
KIR_2DS5	19	54825339	A	0.000152478
KIR_2DS5	19	54815615	T	0.000152323
KIR_2DS5	19	54828444	C	0.000148608
KIR_2DS5	19	54819009	A	0.000147088
KIR_2DS5	19	54946034	A	0.000146753
KIR_2DS5	19	54958363	T	0.000144855
KIR_2DS5	19	54818815	T	0.00014442
KIR_2DS5	19	54403794	G	0.00014397
KIR_2DS5	19	54809212	C	0.000143792
KIR_2DS5	19	54706370	C	0.00014367
KIR_2DS5	19	54818060	A	0.000140212
KIR_2DS5	19	54815139	G	0.000139042
KIR_2DS5	19	54915227	G	0.00013793
KIR_2DS5	19	54824266	A	0.000137356
KIR_2DS5	19	54858684	T	0.000136969
KIR_2DS5	19	54873341	A	0.000132324
KIR_2DS5	19	54715259	G	0.000132183
KIR_2DS5	19	54417568	C	0.000132116
KIR_2DS5	19	54823747	T	0.000131886
KIR_2DS5	19	54862357	T	0.000131648
KIR_2DS5	19	54463257	A	0.000131633
KIR_2DS5	19	54859702	T	0.000127457
KIR_2DS5	19	54896414	T	0.000126156
KIR_2DS5	19	54732710	T	0.000120978
KIR_2DS5	19	54813785	G	0.000120201
KIR_2DS5	19	54856723	T	0.000117191
KIR_2DS5	19	54792693	T	0.000115987
KIR_2DS5	19	54759878	T	0.000115337
KIR_2DS5	19	54742971	G	0.000114417
KIR_2DS5	19	54862412	A	0.000113681
KIR_2DS5	19	54861221	T	0.000111646
KIR_2DS5	19	54813405	G	0.000110697
KIR_2DS5	19	54423738	T	0.00011044
KIR_2DS5	19	54900437	A	0.000109818
KIR_2DS5	19	54632866	A	0.000107884
KIR_2DS5	19	54436152	C	0.000107201
KIR_2DS5	19	54818328	A	0.000106454
KIR_2DS5	19	54861606	G	0.000103572
KIR_2DS5	19	54772702	A	0.000103163
KIR_2DS5	19	54806816	C	0.000102939
KIR_2DS5	19	54857410	T	0.00010281
KIR_2DS5	19	54825429	T	0.000102603
KIR_2DS5	19	54815265	T	0.000102106
KIR_2DS5	19	54817365	C	0.000101839
KIR_2DS5	19	54822211	G	0.000101715
KIR_2DS5	19	54814619	G	0.00010087
KIR_2DS5	19	54828101	G	0.000100659
KIR_2DS5	19	54758122	G	9.96458e-05
KIR_2DS5	19	54822164	C	9.93444e-05
KIR_2DS5	19	54823308	A	9.92014e-05
KIR_2DS5	19	54861645	G	9.87243e-05
KIR_2DS5	19	54803192	G	9.73086e-05
KIR_2DS5	19	54811520	A	9.71148e-05
KIR_2DS5	19	54822350	C	9.35259e-05
KIR_2DS5	19	54825356	G	9.29961e-05
KIR_2DS5	19	54821506	G	9.13335e-05
KIR_2DS5	19	54825796	T	9.00551e-05
KIR_2DS5	19	54828148	A	8.87372e-05
KIR_2DS5	19	54519000	G	8.66441e-05
KIR_2DS5	19	54820520	A	8.53961e-05
KIR_2DS5	19	54896866	A	8.53587e-05
KIR_2DS5	19	54809472	A	8.43584e-05
KIR_2DS5	19	54816505	C	8.37335e-05
KIR_2DS5	19	54859612	G	8.35807e-05
KIR_2DS5	19	54827491	G	8.30676e-05
KIR_2DS5	19	54823937	T	8.19095e-05
KIR_2DS5	19	54823643	G	8.18826e-05
KIR_2DS5	19	54819424	T	8.18505e-05
KIR_2DS5	19	54874148	T	8.12663e-05
KIR_2DS5	19	54821791	T	8.11406e-05
KIR_2DS5	19	54821568	T	8.02347e-05
KIR_2DS5	19	54827610	G	7.77992e-05
KIR_2DS5	19	54828224	C	7.76583e-05
KIR_2DS5	19	54628556	A	7.59232e-05
KIR_2DS5	19	54813019	T	7.57471e-05
KIR_2DS5	19	54818732	C	7.56743e-05
KIR_2DS5	19	54818446	A	7.49961e-05
KIR_2DS5	19	54821518	G	7.49123e-05
KIR_2DS5	19	54929185	G	7.45526e-05
KIR_2DS5	19	54817713	T	7.39705e-05
KIR_2DS5	19	54823183	T	7.37923e-05
KIR_2DS5	19	54645838	CATATATAT	7.1715e-05
KIR_2DS5	19	54823468	GA	7.09632e-05
KIR_2DS5	19	54865114	G	7.08889e-05
KIR_2DS5	19	54666737	G	7.07876e-05
KIR_2DS5	19	54645501	C	7.0391e-05
KIR_2DS5	19	54983583	C	6.9338e-05
KIR_2DS5	19	54819016	A	6.93052e-05
KIR_2DS5	19	54575900	C	6.8816e-05
KIR_2DS5	19	54932717	A	6.86337e-05
KIR_2DS5	19	54433378	T	6.62951e-05
KIR_2DS5	19	54819964	T	6.56657e-05
KIR_2DS5	19	54824041	G	6.21985e-05
KIR_2DS5	19	54896874	G	6.08854e-05
KIR_2DS5	19	54928334	C	6.03179e-05
KIR_2DS5	19	54950745	G	5.91797e-05
KIR_2DS5	19	54818697	G	5.74913e-05
KIR_2DS5	19	54822493	C	5.63782e-05
KIR_2DS5	19	54805365	C	5.61628e-05
KIR_2DS5	19	54823943	TG	5.55274e-05
KIR_2DS5	19	54896783	C	5.45584e-05
KIR_2DS5	19	54813786	A	5.45226e-05
KIR_2DS5	19	54535766	G	5.39345e-05
KIR_2DS5	19	54795193	G	5.26043e-05
KIR_2DS5	19	54481542	GTC	5.2086e-05
KIR_2DS5	19	54889308	A	5.00884e-05
KIR_3DL1	19	54849746	G	0.103968
KIR_3DL1	19	54852249	A	0.022153
KIR_3DL1	19	54835911	G	0.000983458
KIR_3DL1	19	54836220	G	0.000631882
KIR_3DL1	19	54819238	CAGGAACCCAGGTCAAGGACAAGTT	0.000610202
KIR_3DL1	19	54836084	G	0.000386197
KIR_3DL1	19	54828101	G	0.000377962
KIR_3DL1	19	54835981	C	0.000344057
KIR_3DL1	19	54836206	T	0.000238966
KIR_3DL1	19	54821224	AAATAGATAGATCGATAGAT	0.00019796
KIR_3DL1	19	54851913	T	0.00019774
KIR_3DL1	19	54851595	A	0.000162558
KIR_3DL1	19	54825356	G	0.000149043
KIR_3DL1	19	54859629	G	0.000103502
KIR_3DL1	19	54819917	G	9.46709e-05
KIR_3DL1	19	54813377	A	7.98832e-05
KIR_3DL1	19	54824263	T	7.56329e-05
KIR_3DL1	19	54828224	C	7.36481e-05
KIR_3DL1	19	54860808	C	6.84371e-05
KIR_3DL1	19	54875032	A	6.68978e-05
KIR_3DL1	19	54825339	A	6.34015e-05
KIR_3DL1	19	54821003	AGATGATGAT	5.34082e-05
KIR_3DL1	19	54856836	G	5.24467e-05
KIR_3DS1	19	54828148	A	0.0271642
KIR_3DS1	19	54828224	C	0.0267791
KIR_3DS1	19	54828596	A	0.0267236
KIR_3DS1	19	54828221	G	0.0252775
KIR_3DS1	19	54828215	A	0.0246943
KIR_3DS1	19	54827926	C	0.0246475
KIR_3DS1	19	54828438	A	0.0242564
KIR_3DS1	19	54827940	C	0.0236801
KIR_3DS1	19	54828444	C	0.0233664
KIR_3DS1	19	54813668	C	0.0214956
KIR_3DS1	19	54810968	C	0.0210064
KIR_3DS1	19	54811602	G	0.0188844
KIR_3DS1	19	54809472	A	0.0184783
KIR_3DS1	19	54813377	A	0.0182756
KIR_3DS1	19	54810401	C	0.0177076
KIR_3DS1	19	54853020	T	0.0118712
KIR_3DS1	19	54805678	T	0.0105559
KIR_3DS1	19	54828699	T	0.00922483
KIR_3DS1	19	54827742	A	0.00726226
KIR_3DS1	19	54827491	G	0.00671737
KIR_3DS1	19	54827610	G	0.00617306
KIR_3DS1	19	54827662	C	0.00615805
KIR_3DS1	19	54816328	C	0.00593304
KIR_3DS1	19	54827723	T	0.00578303
KIR_3DS1	19	54815139	G	0.00430406
KIR_3DS1	19	54815615	T	0.0043019
KIR_3DS1	19	54815158	A	0.00425888
KIR_3DS1	19	54816238	A	0.0032599
KIR_3DS1	19	54878514	G	0.00265984
KIR_3DS1	19	54803871	C	0.00224879
KIR_3DS1	19	54880440	C	0.00182071
KIR_3DS1	19	54816215	G	0.00162529
KIR_3DS1	19	54630330	T	0.00152576
KIR_3DS1	19	54603607	T	0.0014888
KIR_3DS1	19	54739493	G	0.00121077
KIR_3DS1	19	54739373	T	0.00119708
KIR_3DS1	19	54650796	A	0.000827017
KIR_3DS1	19	54888925	A	0.000803563
KIR_3DS1	19	54681725	T	0.000789621
KIR_3DS1	19	54572919	A	0.000748676
KIR_3DS1	19	54819009	A	0.000716628
KIR_3DS1	19	54657292	A	0.000692787
KIR_3DS1	19	54656626	C	0.000692008
KIR_3DS1	19	54648542	C	0.000645415
KIR_3DS1	19	54889804	G	0.000635793
KIR_3DS1	19	54632756	G	0.000623497
KIR_3DS1	19	54865114	G	0.000600583
KIR_3DS1	19	54659888	T	0.000597126
KIR_3DS1	19	54819114	G	0.00047101
KIR_3DS1	19	54859702	T	0.000444604
KIR_3DS1	19	54821254	C	0.000436202
KIR_3DS1	19	54864728	G	0.000432197
KIR_3DS1	19	54874420	T	0.000396144
KIR_3DS1	19	54946034	A	0.000362904
KIR_3DS1	19	54856723	T	0.000361019
KIR_3DS1	19	54828101	G	0.000331244
KIR_3DS1	19	54492248	G	0.00033008
KIR_3DS1	19	54872846	A	0.000319372
KIR_3DS1	19	54882390	G	0.000290269
KIR_3DS1	19	54958363	T	0.000280292
KIR_3DS1	19	54550147	A	0.00027727
KIR_3DS1	19	54915227	G	0.000276936
KIR_3DS1	19	54819189	T	0.000275903
KIR_3DS1	19	54859612	G	0.000273316
KIR_3DS1	19	54875434	A	0.000254333
KIR_3DS1	19	54878208	T	0.000230481
KIR_3DS1	19	54984683	G	0.000226345
KIR_3DS1	19	54545096	C	0.000189599
KIR_3DS1	19	54768620	C	0.000188624
KIR_3DS1	19	54819067	G	0.000187919
KIR_3DS1	19	54645838	CATATATAT	0.00018572
KIR_3DS1	19	54666720	T	0.000180788
KIR_3DS1	19	54732710	T	0.000175628
KIR_3DS1	19	54771859	A	0.000172391
KIR_3DS1	19	54803192	G	0.000167825
KIR_3DS1	19	54758122	G	0.000165495
KIR_3DS1	19	54880250	A	0.000159102
KIR_3DS1	19	54742971	G	0.000152461
KIR_3DS1	19	54884334	T	0.000142866
KIR_3DS1	19	54628556	A	0.000138904
KIR_3DS1	19	54845634	A	0.000137345
KIR_3DS1	19	54858684	T	0.000132228
KIR_3DS1	19	54432038	C	0.000127598
KIR_3DS1	19	54706370	C	0.000122064
KIR_3DS1	19	54665120	A	0.000120312
KIR_3DS1	19	54637949	A	0.000117071
KIR_3DS1	19	54589798	A	0.000116836
KIR_3DS1	19	54819238	CAGGAACCCAGGTCAAGGACAAGTT	0.000115016
KIR_3DS1	19	54535766	G	0.000105738
KIR_3DS1	19	54599083	G	9.61326e-05
KIR_3DS1	19	54403226	A	9.01155e-05
KIR_3DS1	19	54433378	T	8.95335e-05
KIR_3DS1	19	54978689	G	8.80544e-05
KIR_3DS1	19	54476587	G	8.07819e-05
KIR_3DS1	19	54481542	GTC	7.94262e-05
KIR_3DS1	19	54726137	A	7.77546e-05
KIR_3DS1	19	54744221	A	7.70381e-05
KIR_3DS1	19	54906629	A	6.93612e-05
KIR_3DS1	19	54982758	G	6.80241e-05
KIR_3DS1	19	54917091	T	6.58051e-05
KIR_3DS1	19	54743448	T	6.54588e-05
KIR_3DS1	19	54859091	A	5.68891e-05
KIR_3DS1	19	54928334	C	5.59586e-05
